# Supplementary material for: Terpene Composition Complexity Controls Secondary Organic Aerosol Yields from Scots Pine Volatile Emissions
Source: PubMed Central journal article supplement (PMC5813208; doi:10.1038/s41598-018-21045-1), 2018-02-14
Supplement: 41598_2018_21045_MOESM1_ESM.pdf [file 41598_2018_21045_MOESM1_ESM.pdf]

1 Supplementary Information for: **Terpene Composition Complexity Controls Secondary**  
2 **Organic Aerosol Yields from Scots Pine Volatile Emissions**

3 Faiola, C.L.<sup>1,2\*</sup>, Buchholz, A.<sup>1</sup>, Kari, E.<sup>1</sup>, Yli-Pirilä, P.<sup>3</sup>, Holopainen, J.K.<sup>3</sup>, Kivimäenpää,  
4 M.<sup>3</sup>, Miettinen, P.<sup>1</sup>, Worsnop, D.R.<sup>1,4,5</sup>, Lehtinen, K.E.J.<sup>1,6</sup>, Guenther, A.B.<sup>7</sup>, and  
5 Virtanen, A.<sup>1</sup>

6 <sup>1</sup>Department of Applied Physics, University of Eastern Finland, P.O. Box 1626, 70211 Kuopio,  
7 Finland

8 <sup>2</sup>Department of Ecology and Evolutionary Biology, University of California Irvine, Irvine, CA  
9 92697-2525, United States

10 <sup>3</sup>Department of Environmental and Biological Sciences, University of Eastern Finland, P.O. Box  
11 1627, 70211 Kuopio, Finland

12 <sup>4</sup>Aerodyne Research Inc., Billerica, Massachusetts 08121-3976, United States

13 <sup>5</sup>Department of Physics, University of Helsinki, P.O. Box 64, 00014 Helsinki, Finland

14 <sup>6</sup>Finnish Meteorological Institute, Kuopio, PO Box 1627, 70211 Kuopio, Finland

15 <sup>7</sup>Department of Earth System Science, University of California, Irvine, CA 92697-3100, United  
16 States

17

18 \*Correspondence and request for materials should be addressed to Celia Faiola

19 ([cfaiola@uci.edu](mailto:cfaiola@uci.edu)).

## 20 ***PTR-ToF-MS Data Processing***

21 The mass scale calibration of the PTR-ToF-MS was performed using 3 compounds that  
22 were always present in mass spectra of the tree emissions:  $\text{H}_3\text{O}_{18}^+$  at  $m/z$  21.0226,  $\text{NO}^+$   
23 at  $m/z$  29.998, and  $\text{C}_{10}\text{H}_{17}^+$  at  $m/z$  137.133. Furthermore, the transmission efficiency of  
24 ions with different molar masses through the PTR-ToF-MS was calibrated using a  
25 calibration gas standard containing 8 aromatic compounds with mixing ratios ~100 ppbV  
26 in nitrogen (BOC, United Kingdom). The mass scale calibration and peak fitting for PTR-  
27 ToF-MS data were done using PTR-MS Viewer software (Ionicon Analytik), and the  
28 data were further analyzed using MATLAB. For PTR-ToF-MS data-analysis of  
29 monoterpenes and sesquiterpenes, the calibration corrected molecular ions were used  
30 to calculate the emission rates of these compounds. Therefore, for monoterpenes the  
31 peak present at  $m/z$  137.13 was used, and for sesquiterpenes the peak at  $m/z$  205.20.  
32 The calibration of the PTR-ToF-MS with pure standards was done using a dynamic  
33 dilution system (Faiola et al., 2012; Kari et al., in review). From the calibration of pure  
34 standards the calibration factors of molecular ions of mono- and sesquiterpenes for  
35 PTR-ToF-MS in this study were calculated using the weighted averages based on GC-  
36 MS data. For monoterpenes the calibration factor used was the weighted average of the  
37 calibration factors of following compounds:  $\alpha$ -pinene, camphene,  $\beta$ -myrcene,  $\beta$ -pinene,  
38 3-carene,  $\delta$ -limonene, and  $\beta$ -phellandrene for which all, except for camphene and  $\beta$ -  
39 phellandrene, the calibration was done using the pure compounds. For camphene and  
40  $\beta$ -phellandrene the calibration factors of  $\beta$ -pinene and limonene was used, respectively,  
41 because of the similar structures the compounds have. The calibration factor used to  
42 correct the molecular ion of sesquiterpenes was calculated from the calibration factors  
43 of longifolene,  $\beta$ -caryophyllene,  $\alpha$ -muurolene,  $\alpha$ -amorphene, and  $\delta$ -cadinene. For  
44 longifolene, and  $\beta$ -caryophyllene the pure standards were used for the determination of  
45 the calibration factors. For the rest of sesquiterpenes the calibration factor of  $\alpha$ -  
46 humulene was used.

47

## 48 ***GC-MS Authentic Standards***

49 An authentic terpenoid and green leaf volatile standard was run with each set of GC  
50 cartridge samples. Two standard cartridges were prepared with each standard. The  
51 standard contained the following compounds:  $\alpha$ -pinene, camphene, sabinene,  $\beta$ -pinene,  
52  $\beta$ -myrcene, 3-carene, limonene, 1,8-cineole,  $\gamma$ -terpinene, terpinolene, linalool, E-DMNT,  
53 camphor, borneol, terpinen-4-ol,  $\alpha$ -terpineol, bornyl acetate, longifolene, trans- $\beta$ -  
54 farnesene,  $\alpha$ -humulene,  $\alpha$ -copaene, trans-caryophyllene, aromadendrene,  $\beta$ -elemene.  
55 The green leaf volatile standard contained the following compounds: cis-3-hexen-1-ol,  
56 trans-2-hexenal, 1-hexanol, 1-octen-3-ol, cis-3-hexenyl acetate, 1-chloro-octane,  
57 nonanal, cis-3-hexenyl butyrate, methyl salicylate, cis-3-hexenyl isovalerate, and cis-3-  
58 hexenyl tiglate. A stock solution of each mixture was prepared in 100 mL of methanol.  
59 The stock solution was diluted in methanol 10:1 and 2  $\mu$ L were injected onto adsorbent  
60 cartridges with a micro-syringe.

61

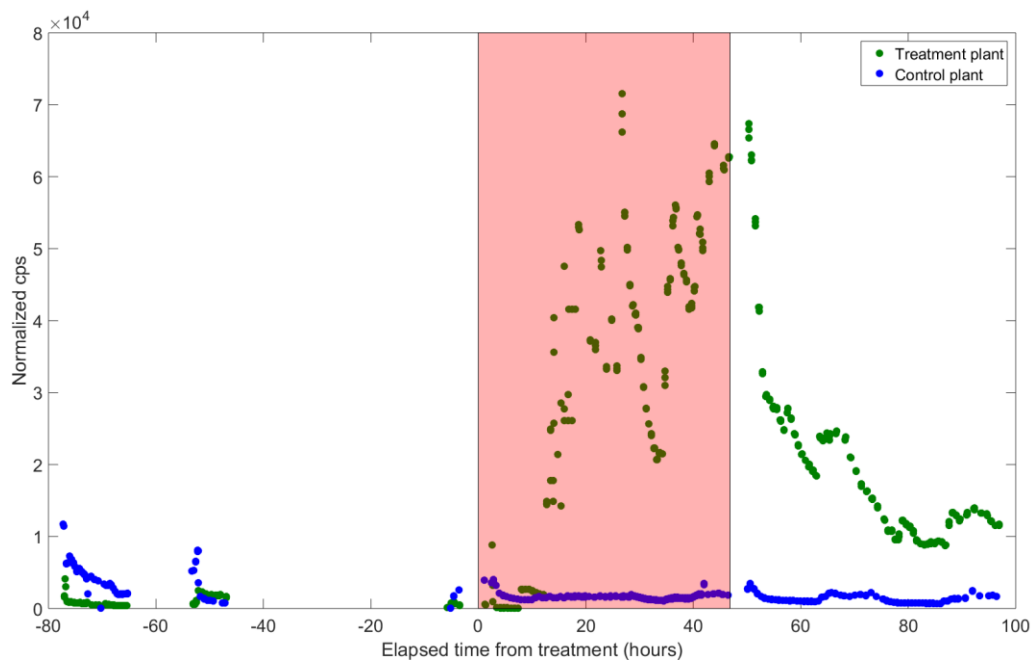

62

63 Figure S1: A time-series from experiment 1 of normalized counts per second (cps) for m137, the  
64 molecular ion of monoterpenes. The data was corrected with a calibration factor to account for  
65 fragmentation in the PTR-ToF-MS. The shaded region denotes the herbivore exposure. The  
66 m137 measured from the treatment plant emissions is shown in green and from the control  
67 plant is shown in blue. Note the delay in emission increase after herbivores were applied. An

68 herbivore emission effect was not observed until after the herbivores began feeding the  
69 following morning.

70

71

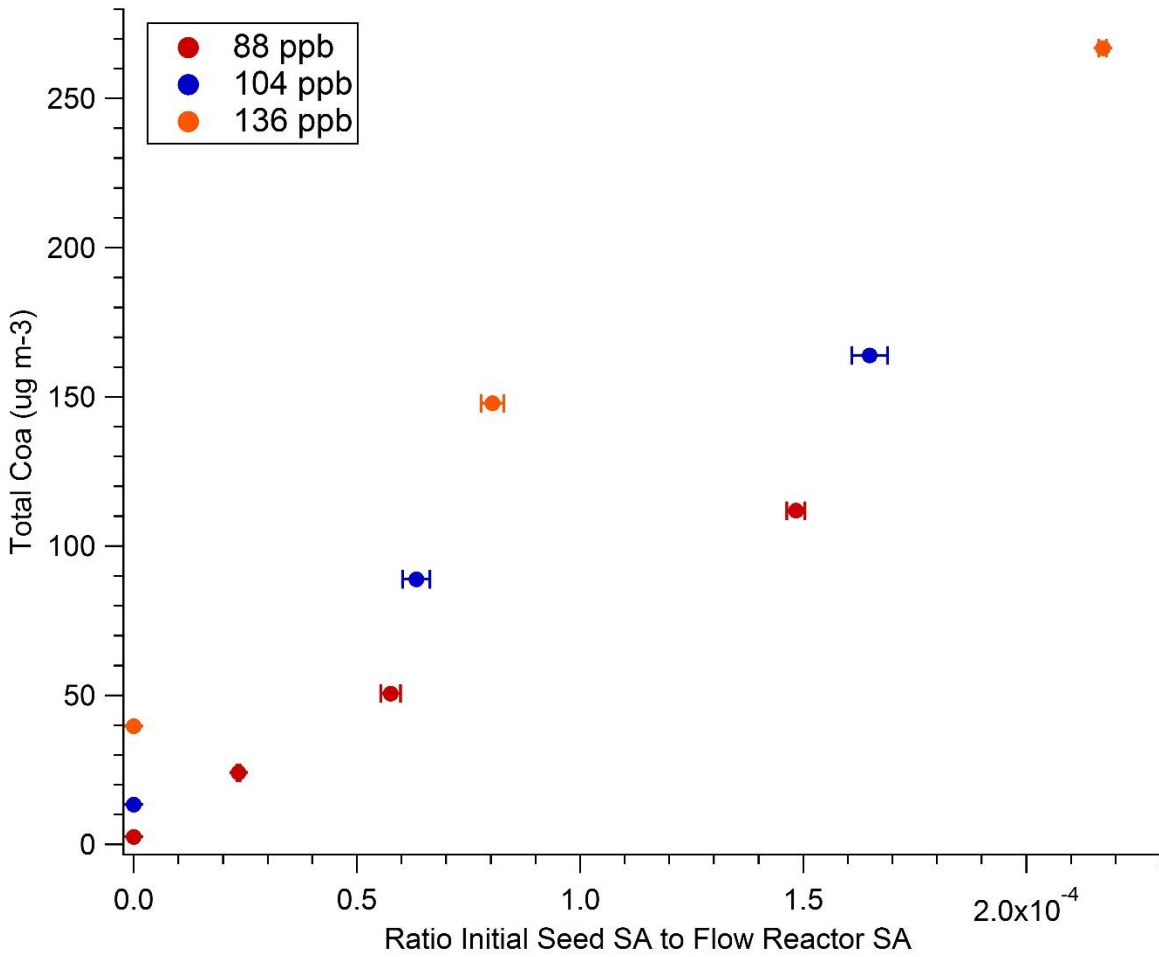

72

73 Figure S2: SOA mass yield versus the ratio of the initial seed particle surface area ( $S_{s,i}$ ) to the  
 74 flow reactor surface area ( $S_f$ ) for three different  $\alpha$ -pinene mixing ratios. Yields were strongly  
 75 dependent on seed surface area. For example, SOA mass yield from 88 ppb reacted  $\alpha$ -pinene  
 76 increased from 1% without any seed to nearly 11% with high seed.

77

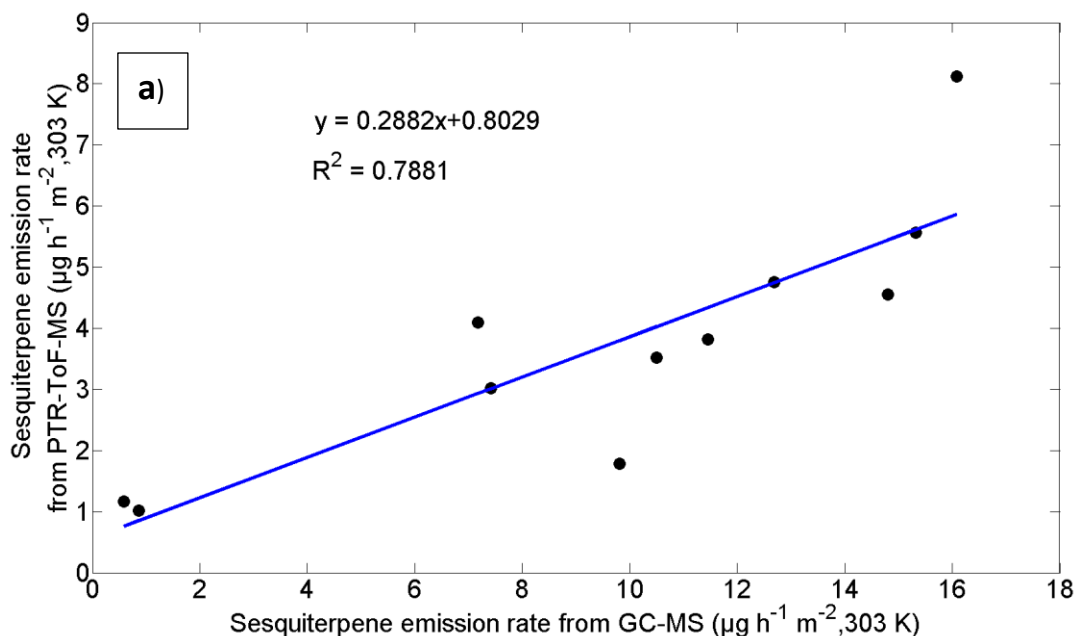

78

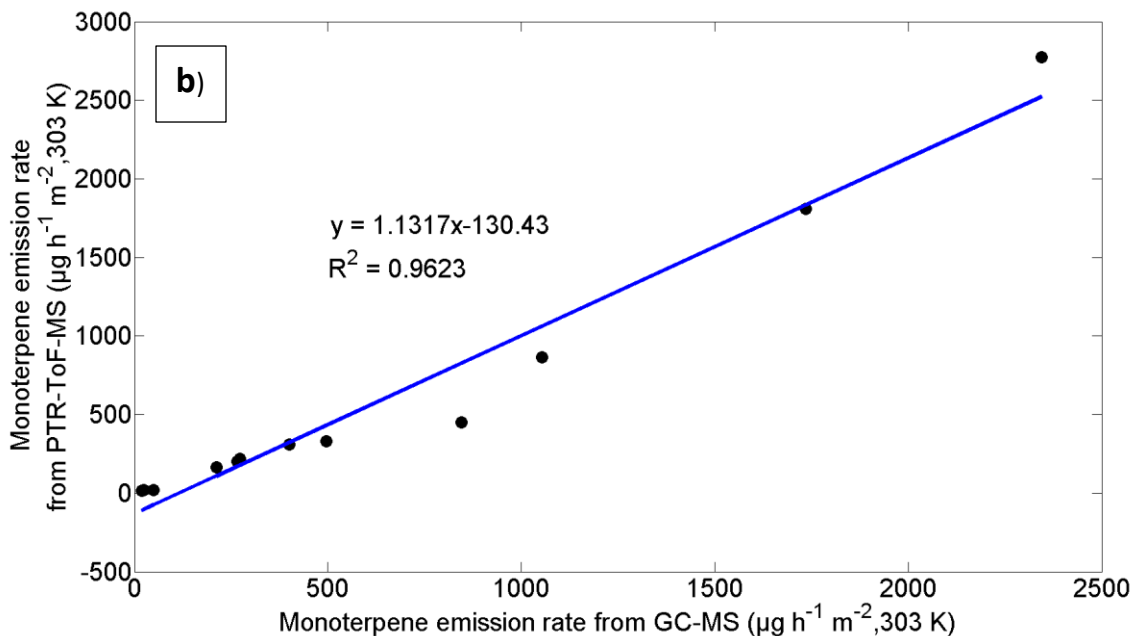

79

80 Figure S3: Inter-comparison between PTR-ToF-MS and TD-GC-MS measurements for  
 81 sesquiterpene emissions (a), and monoterpene emissions (b). TD-GC-MS cartridge samples  
 82 were collected immediately downstream of the plant enclosure to minimize sampling line  
 83 losses. The PTR was connected to an automated valve system with long sampling lines. There  
 84 were minimal sampling line losses of monoterpenes, and high losses of sesquiterpenes. PTR  
 85 sesquiterpene concentrations were corrected for loss by multiplying PTR values by 3.27 based  
 86 on the slope in (a). Sesquiterpenes were also corrected for fragmentation patterns from  
 87 standard runs (Kari et al., in preparation).

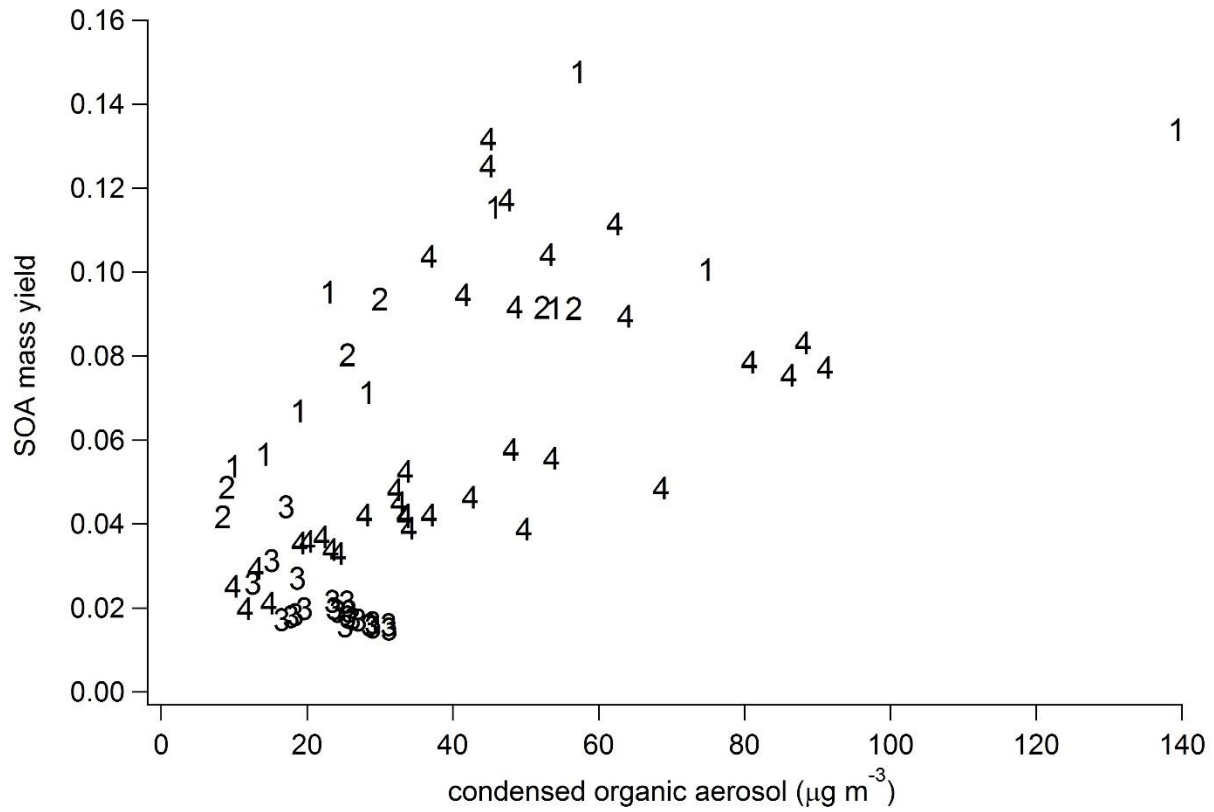

89

90 Figure S4: SOA mass yields during active feeding periods. Marker numbers denote the  
 91 experiment number. Generally, SOA mass yields were higher during active feeding periods in  
 92 experiments 1 and 2 than they were in experiments 3 and 4.

Table S1: Average basal emission rates ( $\mu\text{g m}^{-2} \text{h}^{-1}$ , 303 K) of plant volatiles during each experimental phase (pre-treatment, active feeding, and post-treatment) for each experiment. Errors are provided in parentheses and were propagated from the standard deviations of duplicate cartridge samples analyzed via TD-GC-MS. bdl=below detection limit.

|                    | Exp # | Pre-Treatment |             | Active     |                | Post-Treatment |              |
|--------------------|-------|---------------|-------------|------------|----------------|----------------|--------------|
|                    |       | Control       | Treatment   | Control    | Treatment      | Control        | Treatment    |
| $\alpha$ -pinene   | 1     | 30.8 (4.9)    | 4.2 (0.3)   | 20.2 (1.0) | 247.9 (20.8)   | 1.2 (0.1)      | 13.1 (0.4)   |
|                    | 2     | 15.0 (0.4)    | 8.5 (0.1)   | 6.0 (0.3)  | 462.9 (34.2)   | 6.7 (0.4)      | 431.4 (6.8)  |
|                    | 3     | 2.9 (0.3)     | 2.3 (0.1)   | 2.3 (0.09) | 164.1 (24.0)   | 1.8 (0.04)     | 57.8 (6.5)   |
|                    | 4     | 8.1 (0.3)     | 9.6 (0.7)   | 8.0 (0.2)  | 239.1 (7.9)    | 3.8 (0.2)      | 32.1 (2.2)   |
| camphene           | 1     | 12.3 (1.9)    | 1.7 (0.1)   | 6.5 (1.1)  | 292.2 (56.1)   | 0.3 (0.05)     | 6.9 (0.3)    |
|                    | 2     | 3.2 (0.3)     | 6.1 (0.03)  | 1.3 (0.3)  | 239.9 (19.4)   | 0.7 (0.06)     | 75.7 (2.4)   |
|                    | 3     | 1.9 (0.2)     | 0.9 (0.03)  | 1.7 (0.1)  | 84.0 (8.3)     | 1.3 (0.03)     | 18.1 (1.9)   |
|                    | 4     | 2.7 (0.1)     | 3.2 (0.3)   | 0.9 (0.05) | 9.6 (3.5)      | 0.9 (0.1)      | 6.9 (0.7)    |
| $\beta$ -pinene    | 1     | 1.6 (0.1)     | 1.4 (0.1)   | 0.9 (0.05) | 134.1 (16.6)   | 0.07 (0.004)   | 0.8 (0.02)   |
|                    | 2     | 0.7 (0.03)    | 2.0 (0.02)  | 0.8 (0.2)  | 128.2 (14.4)   | 0.4 (0.04)     | 108.4 (2.5)  |
|                    | 3     | 0.5 (0.03)    | 0.4 (0.01)  | 0.4 (0.02) | 12.5 (2.7)     | 0.4 (0.05)     | 3.1 (0.3)    |
|                    | 4     | 0.6 (0.02)    | 0.9 (0.08)  | 0.4 (0.03) | 10.3 (1.3)     | 0.2 (0.01)     | 1.2 (0.06)   |
| $\beta$ -myrcene   | 1     | 1.9 (0.3)     | 1.3 (0.02)  | 1.3 (0.1)  | 564.0 (63.6)   | 0.08 (0.01)    | 2.9 (0.06)   |
|                    | 2     | 1.3 (0.08)    | 1.0 (0.01)  | 2.6 (0.8)  | 123.2 (2.2)    | 1.7 (0.06)     | 71.1 (0.7)   |
|                    | 3     | 0.6 (0.03)    | 0.5 (0.02)  | 0.5 (0.02) | 36.1 (2.2)     | 0.4 (0.02)     | 6.2 (0.5)    |
|                    | 4     | 1.5 (0.08)    | 17.6 (1.4)  | 0.5 (0.02) | 63.5 (3.4)     | 0.2 (0.01)     | 3.6 (0.2)    |
| $\Delta$ -3-carene | 1     | 26.7 (2.0)    | bdl         | 16.8 (0.8) | 2.0 (0.4)      | 1.1 (0.07)     | 0.03 (0.003) |
|                    | 2     | 6.8 (0.2)     | bdl         | 6.4 (1.5)  | 1.2 (0.05)     | 3.3 (0.07)     | 0.3 (0.2)    |
|                    | 3     | 7.4 (0.5)     | 5.7 (0.1)   | 4.6 (0.1)  | 448.1 (27.8)   | 3.4 (0.02)     | 129.4 (8.0)  |
|                    | 4     | 9.8 (0.4)     | 22.8 (1.9)  | 4.6 (0.1)  | 302.6 (12.9)   | 1.6 (0.05)     | 33.9 (1.0)   |
| p-cymene*          | 1     | 13.6 (5.2)    | 1.1 (0.5)   | 25.1 (4.4) | 1584.2 (280.8) | 10.0 (6.7)     | 47.3 (28.8)  |
|                    | 2     | 16.7 (10.1)   | 15.5 (12.1) | 7.5 (3.6)  | 766.7 (109.9)  | 0.9 (0.06)     | 305.3 (50.0) |
|                    | 3     | 16.1 (10.9)   | 12.4 (6.5)  | 7.6 (5.3)  | 185.8 (62.2)   | 1.5 (0.3)      | 62.7 (11.4)  |
|                    | 4     | 5.2 (2.5)     | 4.2 (0.9)   | 0.3 (0.1)  | 10.9 (4.0)     | 1.1 (0.4)      | 11.7 (3.2)   |
| limonene           | 1     | 1.9 (0.3)     | 1.3 (0.1)   | 1.0 (0.2)  | 356.3 (48.9)   | 0.06 (0.01)    | 4.6 (0.2)    |
|                    | 2     | 0.6 (0.09)    | 3.0 (0.09)  | 0.4 (0.09) | 538.4 (28.6)   | 0.3 (0.03)     | 186.7 (3.6)  |
|                    | 3     | 0.2 (0.02)    | 2.3 (0.08)  | 0.2 (0.03) | 115.6 (9.2)    | 0.1 (0.05)     | 17.7 (1.9)   |
|                    | 4     | 7.1 (0.3)     | 1.4 (0.2)   | 2.2 (0.1)  | 22.5 (7.9)     | 0.8 (0.04)     | 2.2 (0.3)    |



|                        |   |             |             |             |              |              |              |
|------------------------|---|-------------|-------------|-------------|--------------|--------------|--------------|
| $\beta$ -phellandrene* | 1 | 0.6 (0.09)  | 0.1 (0.1)   | 0.5 (0.03)  | 26.5 (3.6)   | bdl          | 0.3 (0.01)   |
|                        | 2 | 0.8 (0.08)  | 1.1 (0.01)  | 2.3 (0.7)   | 212.4 (1.4)  | 1.2 (0.01)   | 134.5 (2.2)  |
|                        | 3 | 0.4 (0.02)  | 2.2 (0.09)  | 0.2 (0.01)  | 102.6 (8.6)  | 0.2 (0.02)   | 11.3 (0.8)   |
|                        | 4 | 13.5 (0.7)  | 22.6 (2.0)  | 5.1 (0.2)   | 138.4 (4.3)  | 1.2 (0.06)   | 8.1 (0.3)    |
| Other MT**             | 1 | 9.0 (0.5)   | 1.3 (0.1)   | 4.9 (0.4)   | 705.7 (58.4) | 0.3 (0.02)   | 9.0 (0.4)    |
|                        | 2 | 3.5 (0.4)   | 3.1 (0.08)  | 2.1 (0.3)   | 296.4 (18.3) | 1.7 (0.1)    | 105.7 (2.7)  |
|                        | 3 | 7.4 (0.4)   | 4.6 (0.2)   | 7.1 (0.3)   | 259.0 (8.6)  | 2.2 (0.01)   | 36.1 (0.8)   |
|                        | 4 | 4.3 (0.6)   | 7.5 (0.2)   | 1.5 (0.03)  | 92.3 (5.3)   | 1.0 (0.05)   | 10.4 (0.4)   |
| longifolene            | 1 | 0.4 (0.002) | bdl         | 0.5 (0.03)  | 0.1 (0.1)    | bdl          | bdl          |
|                        | 2 | 0.7 (0.02)  | 0.2 (0.1)   | 0.6 (0.02)  | 0.3 (0.01)   | 0.4 (0.005)  | 0.3 (0.01)   |
|                        | 3 | 0.1 (0.007) | 0.2 (0.01)  | 0.1 (0.007) | 0.9 (0.03)   | 0.07 (0.07)  | 0.6 (0.01)   |
|                        | 4 | 0.3 (0.01)  | 0.1 (0.006) | 0.2 (0.004) | 0.2 (0.009)  | 0.1 (0.006)  | 0.09 (0.004) |
| $\beta$ -caryophyllene | 1 | 2.7 (0.3)   | bdl         | 1.4 (0.1)   | 0.6 (0.04)   | 0.06 (0.006) | 0.05 (0.003) |
|                        | 2 | 1.5 (0.07)  | 0.5 (0.01)  | 0.3 (0.02)  | 2.7 (0.2)    | 0.1 (0.01)   | 1.1 (0.02)   |
|                        | 3 | 0.1 (0.06)  | bdl         | 0.1 (0.003) | 0.1 (0.007)  | 0.2 (0.01)   | 0.1 (0.02)   |
|                        | 4 | 0.5 (0.03)  | 1.8 (0.09)  | 0.3 (0.008) | 1.5 (0.09)   | 0.02 (0.009) | 0.1 (0.005)  |
| $\beta$ -farnesene     | 1 | bdl         | 0.7 (0.05)  | bdl         | 2.3 (0.2)    | bdl          | 0.1 (0.01)   |
|                        | 2 | 1.7 (0.8)   | 2.1 (0.02)  | bdl         | bdl          | bdl          | bdl          |
|                        | 3 | 0.1 (0.02)  | 0.2 (0.01)  | 0.9 (0.2)   | 1.1 (0.1)    | bdl          | 0.1 (0.01)   |
|                        | 4 | 2.4 (0.1)   | 1.6 (0.2)   | 0.3 (0.013) | 0.2 (0.01)   | bdl          | 0.05 (0.005) |
| Other SQT**            | 1 | 38.2 (0.6)  | 3.6 (0.1)   | 24.3 (1.0)  | 20.8 (0.6)   | 1.2 (0.04)   | 2.9 (0.06)   |
|                        | 2 | 31.2 (0.7)  | 18.5 (0.1)  | 8.7 (0.2)   | 70.6 (2.5)   | 6.7 (0.3)    | 56.4 (1.0)   |
|                        | 3 | 5.7 (0.3)   | 0.8 (0.1)   | 4.3 (0.2)   | 9.2 (0.2)    | 3.2 (0.01)   | 9.3 (0.1)    |
|                        | 4 | 3.9 (0.1)   | 8.7 (0.2)   | 2.6 (0.05)  | 15.2 (0.6)   | 0.7 (0.03)   | 7.5 (0.2)    |

\*These compounds were not included in the GC standard and thus these BER values are semi-quantitative. MS quantitation was performed using the terpinolene standard as a proxy. Terpinolene was selected as a proxy because of similarity in structure to  $\beta$ -phellandrene.

\*\*Many of the compounds in the “other” categories were not included in the GC standard. A proxy was chosen from the standard compounds based on structural and mass spectral similarity. These BER values are also semi-quantitative. Compounds in the other monoterpenoids category include the following: tricyclene,  $\beta$ -fenchene,  $\alpha$ -fenchene, sabinene,  $\alpha$ -phellandrene,  $\alpha$ -terpinene, 1,8-cineole,  $\beta$ -ocimene,  $\gamma$ -terpinene, terpinolene, camphor, borneol, bornyl acetate, and 10 unidentified monoterpenes. The unidentified monoterpenes had clear monoterpene mass spectra, but NIST identification matched them with monoterpenes that had known different retention times. Compounds in the other sesquiterpenes category include the following:  $\alpha$ -copaene,  $\beta$ -elemene, junipene, isolongifolene,  $\alpha$ -humulene,  $\beta$ -cubebene, valencene, murolene,

$\alpha$ -amorphene,  $\delta$ -cadinene, cadi-1,4-diene, and two unidentified compounds that clearly had a sesquiterpene NIST spectra match, but the match was not consistent with other known sesquiterpene retention times.
